# Supplementary material for: In Vivo Regulation of E2F1 by Polycomb Group Genes in Drosophila
Source: PubMed Central journal article supplement (PMC3516486; doi:10.1534/g3.112.004333), 2012-12-01
Supplement: supp_2.12.1651_FigureS1.pdf [file supp_2.12.1651_FigureS1.pdf]

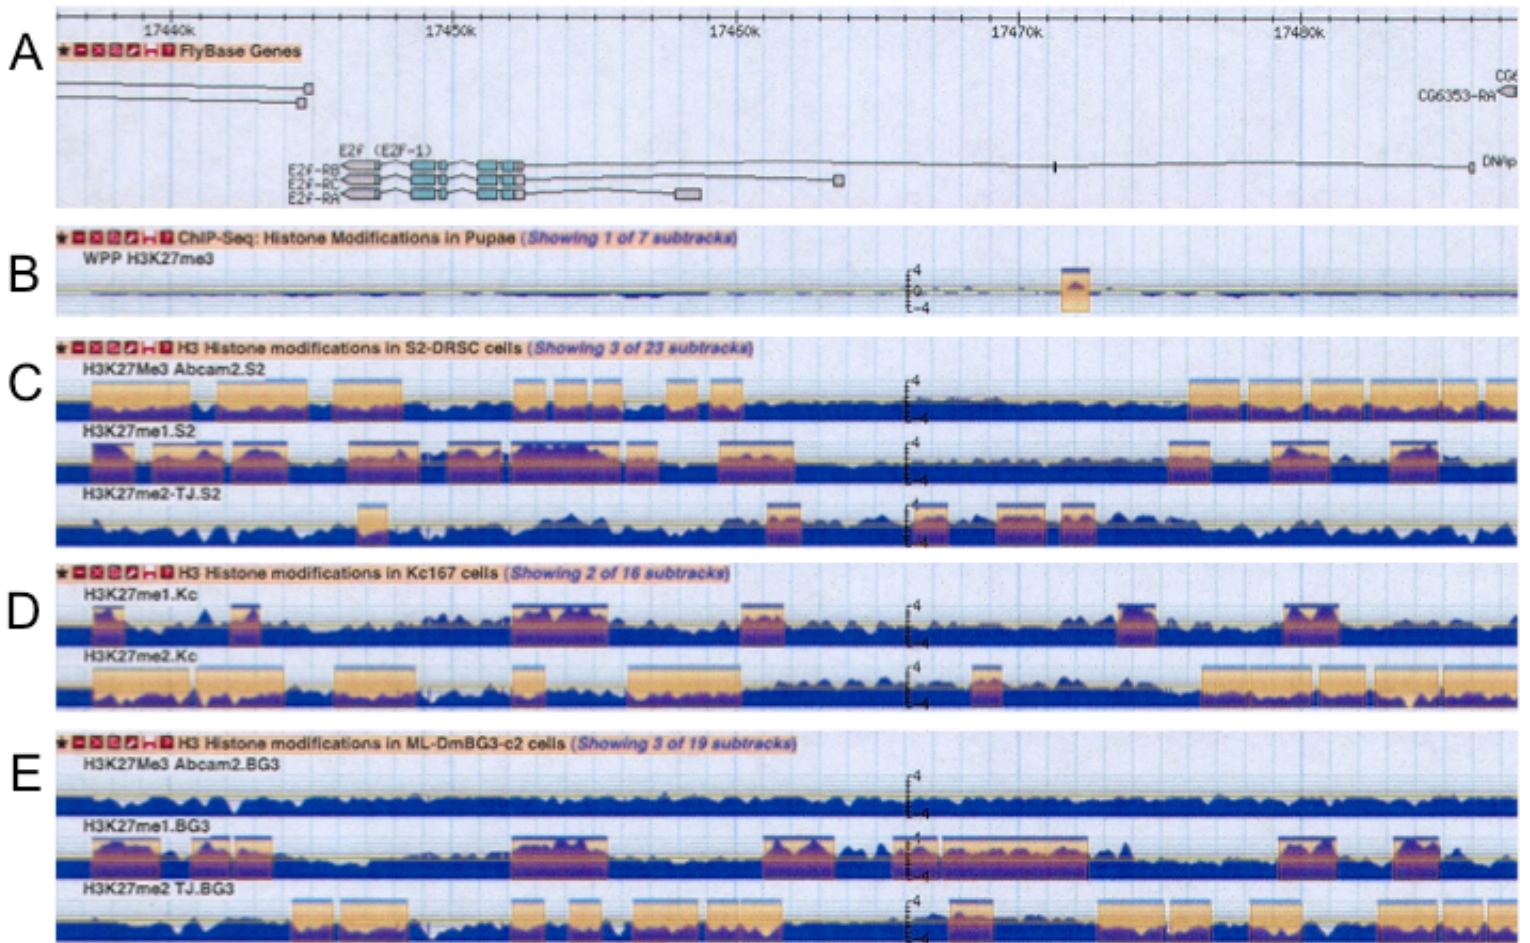

**Figure S1** The H3K27me status on the *dE2f1* gene (A; Region surveyed: 3R:17444026..17488127) during the white prepupal (WPP) stage (B) and in *Drosophila* SL2 (C), Kc (D) and BG3 (E) cells. These results are obtained from the ChIP-chip and ChIP-Seq data sets provided by Drs. Gary Karpen, Vincenzo Pirrotta, and Kevin White laboratories from the modENCODE Project (<http://modencode.oicr.on.ca/fgb2/gbrowse/fly/>). Note: H3K27me3 is enriched at the *dE2f1* locus during the WPP developmental stage (B), and the enrichment of H3K27me1/2 in *dE2f1* locus in all the three cell lines analyzed (C/D/E).
