# Supplementary material for: In Vivo Regulation of E2F1 by Polycomb Group Genes in Drosophila
Source: PubMed Central journal article supplement (PMC3516486; doi:10.1534/g3.112.004333), 2012-12-01
Supplement: supp_2.12.1651_FigureS2.pdf [file supp_2.12.1651_FigureS2.pdf]

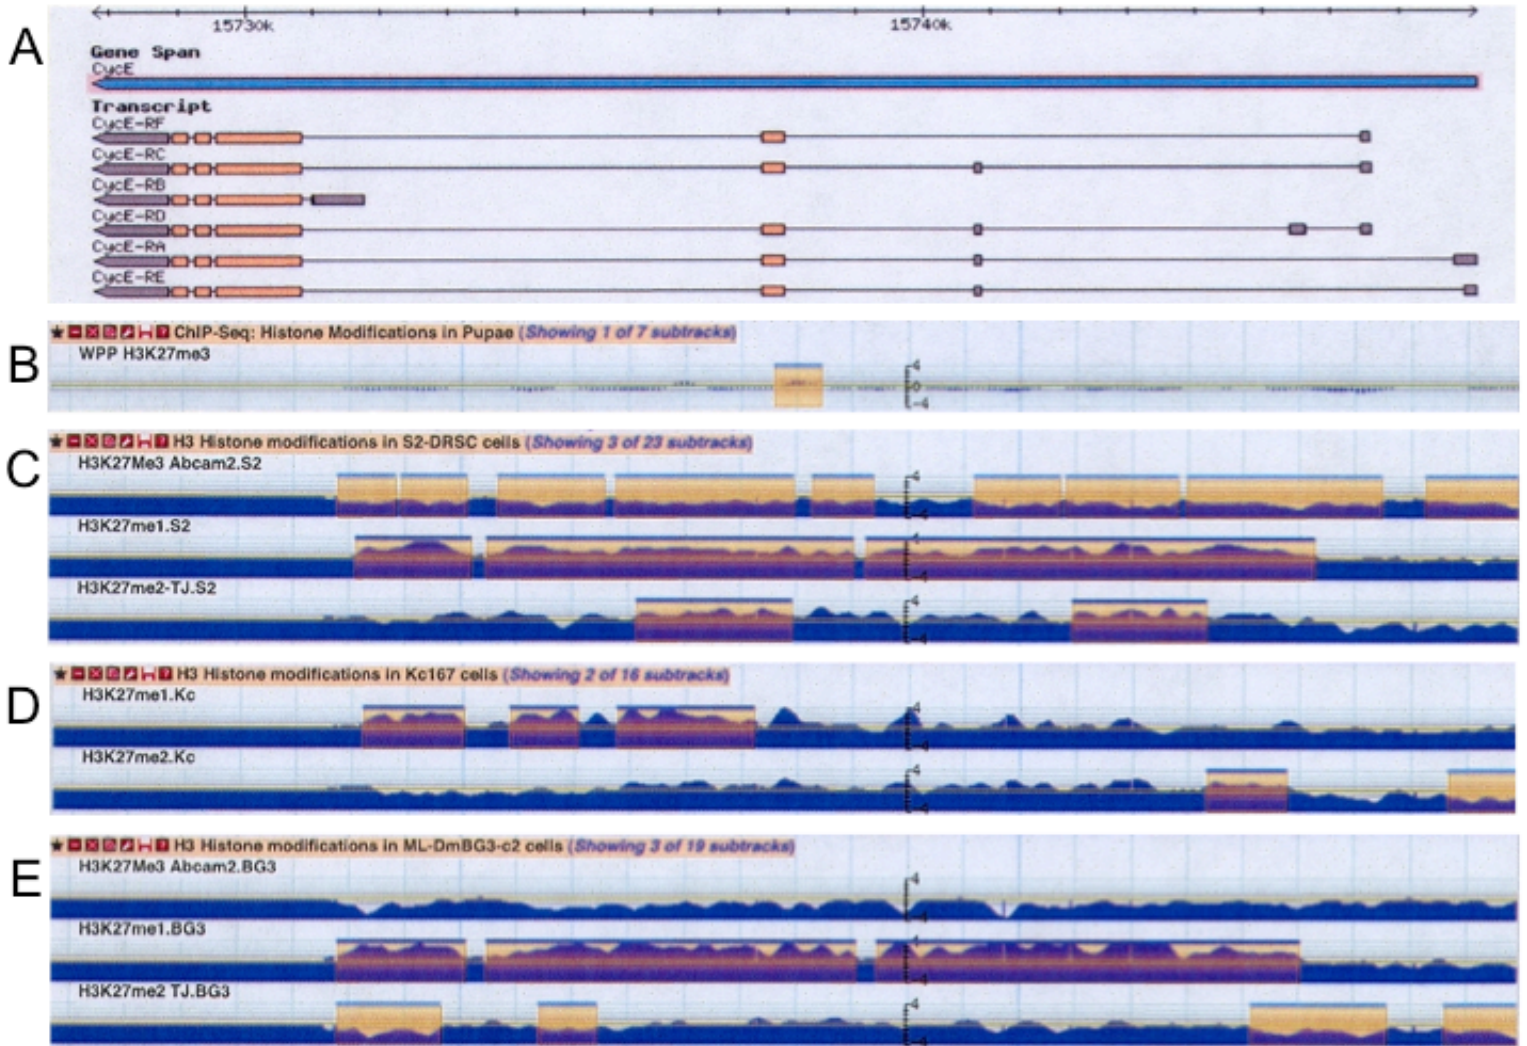

**Figure S2** The H3K27me status on the *dCycE* gene (**A**; Region surveyed: 2L:15712959..15762958) during the WPP stage (**B**) and in *Drosophila* SL2 (**C**), Kc (**D**) and BG3 (**E**) cells. Note the enrichment of H3K27me3 in *dCycE* locus during the WPP stage (**B**), and the enrichment of H3K27me1/2 in *dCycE* locus in all the three cell lines analyzed (**C/D/E**).
