# Supplementary material for: In Vivo Regulation of E2F1 by Polycomb Group Genes in Drosophila
Source: PubMed Central journal article supplement (PMC3516486; doi:10.1534/g3.112.004333), 2012-12-01
Supplement: supp_2.12.1651_FigureS3.pdf [file supp_2.12.1651_FigureS3.pdf]

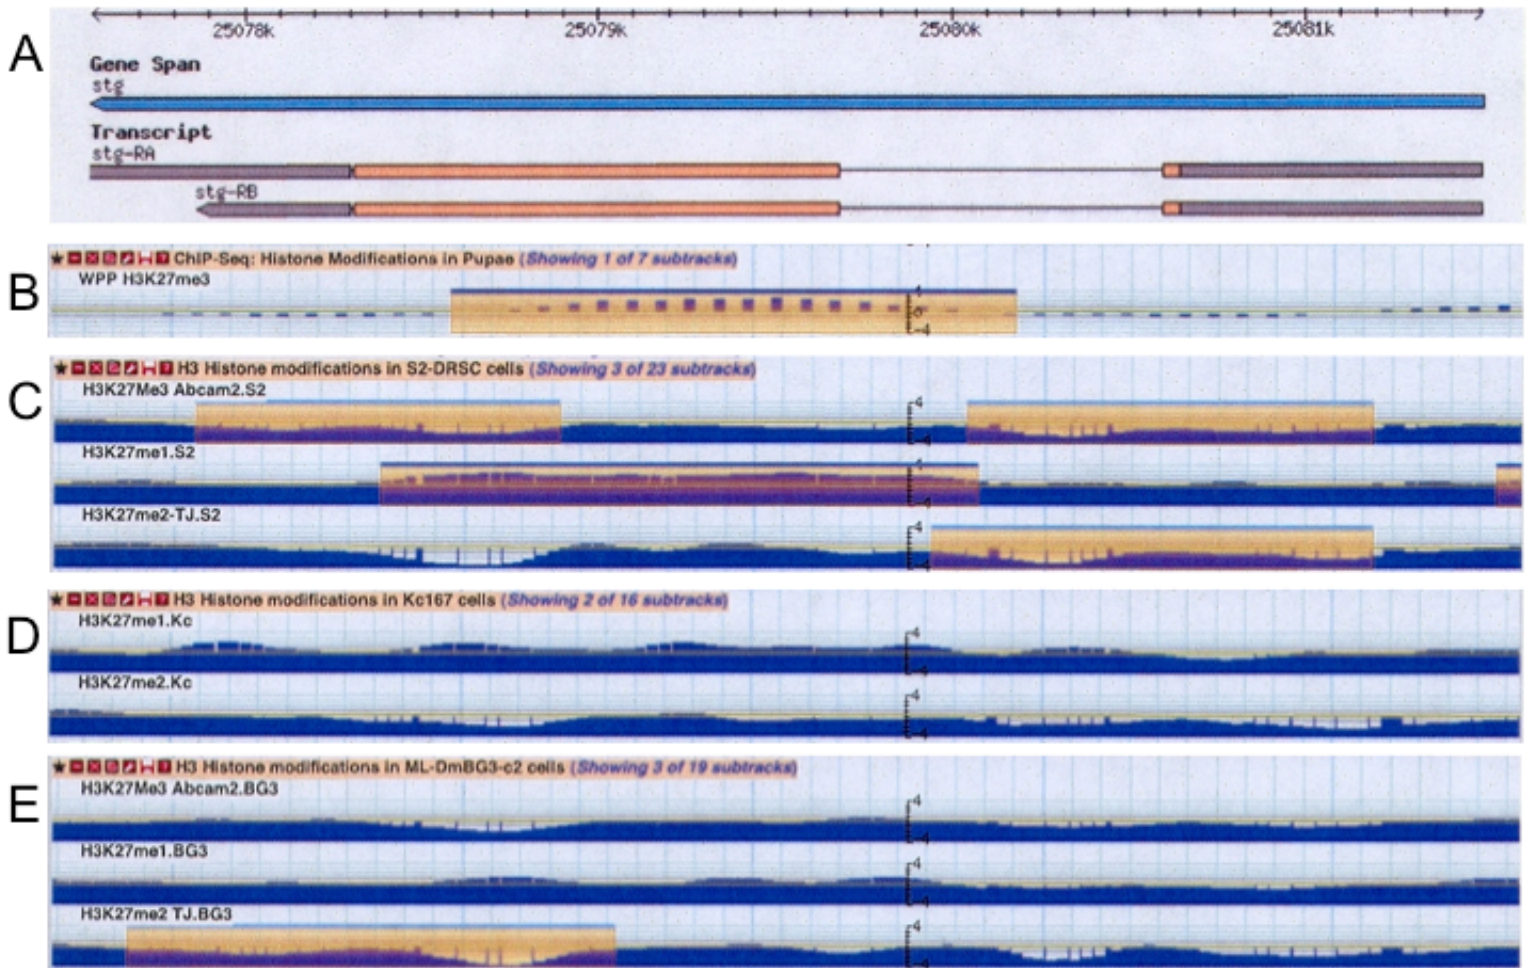

**Figure S3** The H3K27me status on the *stg* gene (A; Region surveyed: 3R:25064521..25114520) during the WPP stage (B) and in *Drosophila* SL2 (C), Kc (D) and BG3 (E) cells. Note the enrichment of H3K27me3 in *stg* locus during the WPP stage (B), and the enrichment of H3K27me1 in *stg* locus in SL2 cells (C).
