# Supplementary material for: In Vivo Regulation of E2F1 by Polycomb Group Genes in Drosophila
Source: PubMed Central journal article supplement (PMC3516486; doi:10.1534/g3.112.004333), 2012-12-01
Supplement: supp_2.12.1651_FigureS4.pdf [file supp_2.12.1651_FigureS4.pdf]

### H3K27me3\_WPP\_Chip\_seq.12700 Details

Name: H3K27me3\_WPP\_Chip\_seq.12700  
Type: binding\_site  
Description:  
Source: 14111\_details  
Position: 3R:17471579..17472512  
Length: 934  
Score: 198.51  
analysis: H3K27me3\_WPP\_Chip\_seq.MACS  
load\_id: 159737658  
primary\_id: 1274681  
browse\_dbid: white.database

A

```
>H3K27me3 WPP Chip seq.12700 class=Sequence position=3R:17471579..17472512
AGACAAAAG ACCTGGAAAG GTTCGAAGGC AAACACAAAT GAACAAACAG CCGCCACAGC CAATGCCAAC AAGTTGTCG
AATCAAAACAG AGCAACTTAC GAGCAGAAAC GAGATCCAAG CTCTCTCAGA TCCCGATTTC GATCGCCTTG CTTTGGCTGT
TAAAAATATG AGAAACATTT ATAACTTTTT CCGTAACACT TCTTCTCTCC OCTGGCTGGC ATTTAAGAA CTTTAGCGAT
TTATGCTCTC CTCAGCCGAG CCGAGCCAAA CCTGATTTGC TCTGTACGAC CAACAGCCGC GCTTAAGGCC AGGAGCCGCA
GCCAAAGTCC CAGACCTTFA AAGGCCCGCA CCGACTGTAC GTAGCAARTA AAACAGAGCC CCGTCCAAA AAGGAGCCGC
AGCAGGACTC ACTACCCAAAT ACATGCCAGC AATCCAAAGC CGACACTGCC GGCACAGAC TCCAAAGACT CCTCTCTCC
ATTCGCTGCG CCATCCGAC TCCGAAGTTC CAGGCCCTCA CTCGCCACA TCTTGCACAC ACTGTGAGAA TCAATTTAAT
TAAGCCAAAT CCATCCGAC CCAAAAGCCA AGGACCAAT CCAGCCGAC ACAAACCCAG CAGCACCCAG CCGAGCCGCG
ATCGGATCT TCGACAGCC AGCCAGCCCA ATGCGCTCAG TCGAAAGTCT AGCTCTGGTC AAGCTGGGA CCGAGCCGCG
CCCGATGCA TGAGCAAGT TCTCTCAGG TCCCAACAAA AAGCTATGTC TTATGCCAAA AATGACAC CTTTCCCAT
AAACATGAC ACTTCTTAA AGAGAAAAAA ATTCTAGAG GACTAATGTC TTATGCTATG ATAAATAAAT ATGACTGAC
TCTTATCAT CTAATGACAA AAAAAAATA GAATACAAT CACTTAATT TCAA
```

### H3K27me3\_WPP\_Chip\_seq.2385 Details

Name: H3K27me3\_WPP\_Chip\_seq.2385  
Type: binding\_site  
Description:  
Source: 14111\_details  
Position: 2L:15735620..15736449  
Length: 830  
Score: 86.76  
analysis: H3K27me3\_WPP\_Chip\_seq.MACS  
load\_id: 159739901  
primary\_id: 1267711  
browse\_dbid: white.database

B

```
>H3K27me3 WPP Chip seq.2385 class=Sequence position=2L:15735620..15736449
GGCATTTCG TAAGGATGAC ATGTCCCGAA ACGGGGTAGC AAAATGCCAC CCGATTGGAA AGRATTTTT TTCTATGCT
CCGAACTTC TCCAGAGCA AATGTGCTCT CGATGATAT TTAATTGAG ACGAAAGAA AAGGGAAAA CTCGGCCGAG
TGAATCTTGA AAGGATGAG GCGTTGCTCA ACCCTCCGCT CCGTTCCTTC GGTGTTGGG GTTTCGACTC TGCCCCATTC
CGCTAGTAC CAGCATCTC TACCATCAC CTTCCCGCA CTTCCGAGCC AATCCCTTAA ACCTCTCTGA TCTAGTCTTT
CTGCTCTGAG CTAGCTTAT ACATGCGAA TTTCAAATC TTTCAGAGCC CTTTACGAGC ATTTCGCGA GTTTCGACTC GCGTAAATC
TTGAAAAAC CACCCCTGCG AGAATCGGA CTTGGACTCA AGCTTGGCC CAGTGGGCA CAGCCCTTTC TGCCCTTCTT
CTGCTCTCC TGCTCTCGCG CCTGCTCTCG TTGCTCTCG CATGCAATG CTTGGCATC TGCCAAAGAC
CCCTTCCGCG AATTCCTTA CTCACAAAG TTGCGCTGAG AGGGGGCCAG ACATTTCTT GCGATGACT TTTTTCGAC
CAGATGACA TTTGTTTGC ACCGAGGCG GCGCAAAAC CATTGCAAA ACAAAAACCT CAAAAAATA ACAGCAAAA
AAATAACCA GCGAGATATC ATTTGTTTGC CAACAGACTC TTCTATACC CTGCTACTA CATTTBAAT TTACATATA
TCTCAGTAC AACCAAGCC ACCTATATA
```

### H3K27me3\_WPP\_Chip\_seq.13914 Details

Name: H3K27me3\_WPP\_Chip\_seq.13914  
Type: binding\_site  
Description:  
Source: 14111\_details  
Position: 3R:25077969..25079907  
Length: 1939  
Score: 916.24  
analysis: H3K27me3\_WPP\_Chip\_seq.MACS  
load\_id: 159740157  
primary\_id: 1272363  
browse\_dbid: white.database

C

```
>H3K27me3 WPP Chip seq.13914 class=Sequence position=3R:25077969..25079907
GATATAATC CAATTTTTC GTTGTCTGT TCGTTGTTA TCTTAAAAAT TTGAACAGA CTGCTTAAAT AATTCAACTA
AAGCCGAAAC CAATAAAACA ATATAAACA AACAAGCCG TTAATTTCCA AATGAAATTC TCTGTTTTGC ATCAATGCGA
CTCTCGGCTC TGTCTCTGC TCGTCTGCA CAACCTTACT ATAGCGATA ACAAAATGAAA ATCAACAAAA ATCAACTTAA
AAGCAGCTC AATAAATAC CCTATACCT CTATATATAC AATACGATA CACCCAAACT TCCATAACCA ACTGCACTAA
CTTCCACA CCTACAGAT CAGTGGGAG CCGACTTCT TTAGCCGCCC GTTGGCCCG TCCAGCCCAT CCGCTTCCA
GGACTTGGC TTGGGGGAA AATGGGAAZ GCGCTGTGT TGGGGGGAT CCAGCATGT GGGTAGGCA TGTGTTCC
AGACTCAAC CTGCACTCC AAGAATCTT TGTAGCGGT GTGAGCAGA TAGACTCCG GATGTCGA CCGCGATAG
GCTTGTAT TCTCTGCGC ATCCGATTA CCGAGAGC GGCATTTT CCGTCCGCG TCCAGAGCA ATTGCACTG
GAGATAATG ATGTTGCGT TTGTCCGSA TTGCGCTTC TCGCTCTCT CCGACTCACT CTGTTGAGC GTAGAGACT
CATCGAGAT CTGCTGGTG GTTACAGT TCTTGGCTCC CTGATGTGG CCGCCCTCA AATGTAAGG GTAGCGCGC
TGCATGAG GGTAGTGGC CACTTATCC CTGAATCCG CCTTAAGAG CCGAGCCACT GTTCCCTGG AGATGCTTT
CAGATCCGA TGAGACCTT CCATCAGGG CAGGGCATAG CTTTCTGTA AGTCCCGAT TNGCTGGCG TCGTTGCGT
TCTGGAGCG GCGCAGCGCG GACATGATC CCGCTCTGT CAGGACATG CACTTCTCA GTGAGGGGG GTGGTAATC
GTACCTTGC TGATGGGCT GCGTCCGGC CAGTCTCTT TCTCAACCG CCGCCAGCA TGGCTTTGC TCTGGATGG
CGAGCTTGC CCGCATCTG CCGTCCGCG GCGCTTGAAG CAATCCCGG CAGTCTCTG GGTCTTTGT GGTGGGCTG
TGTCTCTT GTGTTGCTC TGCTCATC TGAGGCACT TCTGACCGAA GGGGGGGCA TGACAGACC CCGTGGCAT
TTGGCAGCG CTTGCTCTT GATCTGGCG CTGATCAGC AGTTTAGCC ACTGGGAG CCGAGGGCG TCTTGTGCT
CTGCACTCC ATCTGAGAA GCTCCATGA CTCATGCTC ATGAGGACT CCAATGGAG CCAATGGAG TGTGAGGAC AGGCTTTGA
AGATCCGAA CCTGCGCGCC GCGCTGTAT CACTTATAC TCCATGACT GCGAGAATTT TCGCTCCCG GACCATCTG
AAGCTTCCG CCGAGCCCTC GCGGAGAGC AGACCATCA CCGCCGACT GCGCATGCT GCGGATGCT TCGCTATCT
CGCTCTGCG TAGACGACA CCGTCTCTG CTCATGCTC ATCAGTTCA GGGAAACCG ACACAGACA GATCCACTA
TTTTTTTAT CTTACTGAA CTGCTGCTG TATTACTGCA AGAGCAACA AAGAGAGGG GAGGATTAT CAACTGTTG
ACTATGACA AGACAGCTC TTTTCTTCC CTAATCTCT CCAAGAGCG CTCATTAAC CAGCTAAAA ATACTGACA
CTGCTCTG CTGTTGCTA TCGTCTCTA AAAAAACAA AATACCCCA GAAAAACAG AAGGGGGTTC TTCTAATTC
```

**Figure S4** The detailed results of ChIP-Seq analyses showing the enrichment of H3K27me3 in *dE2f1* (A), corresponding to the peak in Fig. S1B), *dCycE* (B), corresponding to the peak in Fig. S2B) and *stg* (C), corresponding to the peak in Suppl. Fig. 3B) loci during the WPP stage. These results are obtained from the ChIP-Seq data sets provided by Dr. Kevin White laboratory from the modENCODE Project (<http://modencode.oicr.on.ca/fgb2/gbrowse/fly/>).
